# Supplementary material
Source: Springer Nature journal article supplement (https://www.springermedizin.de/resource/supplementary/12958_2010_752_MOESM3_ESM.pdf/9568402)

### A. BeWo cells

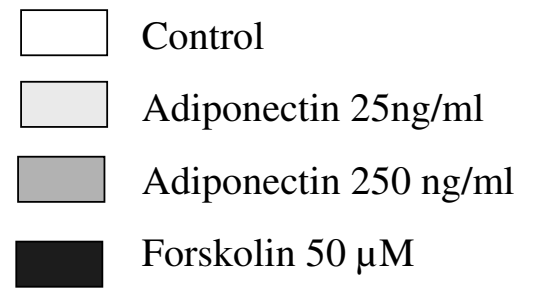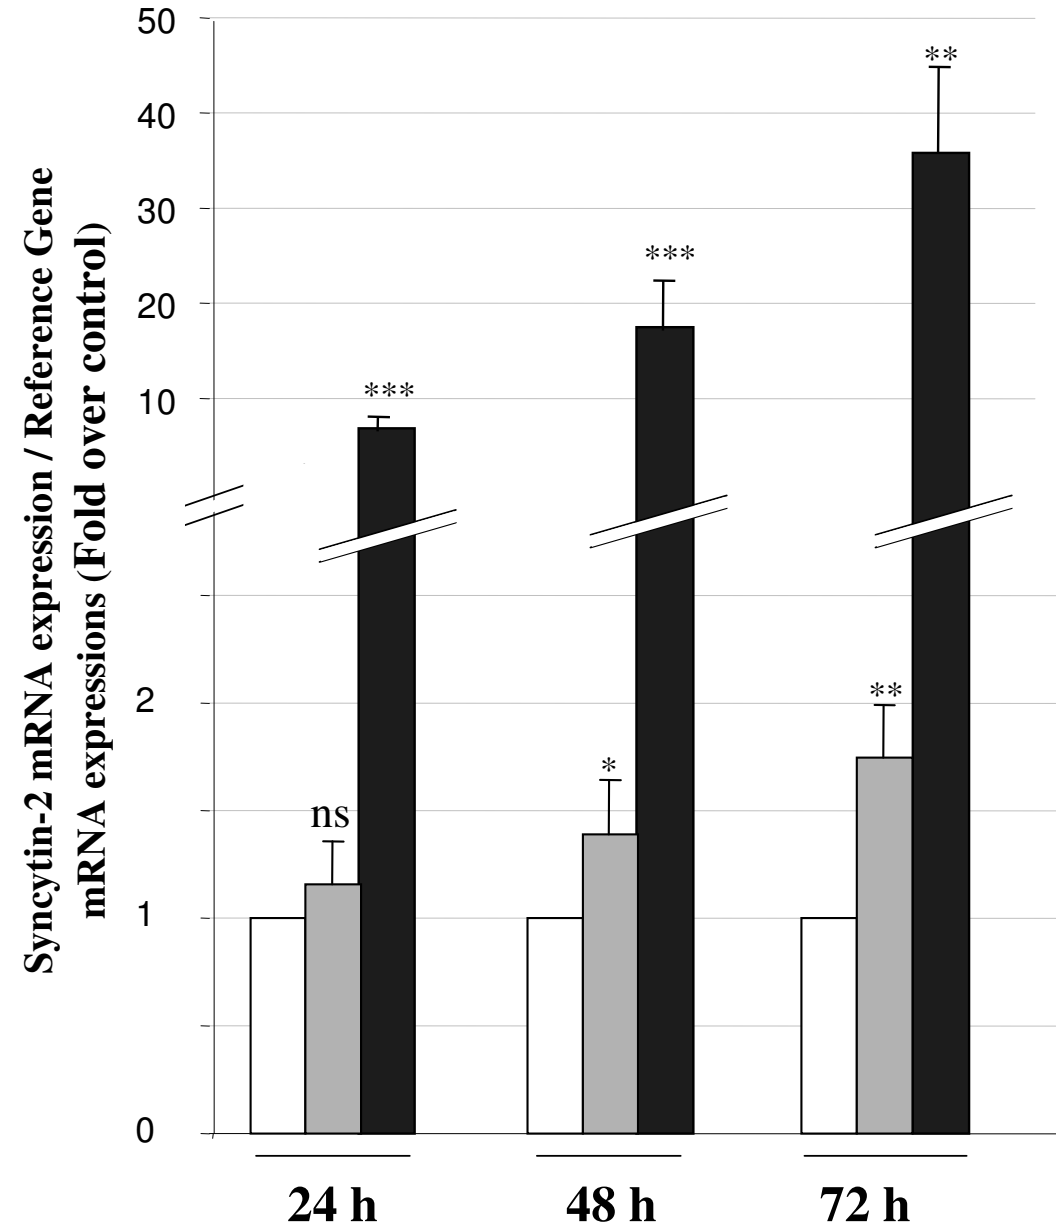

### B. Villous CT

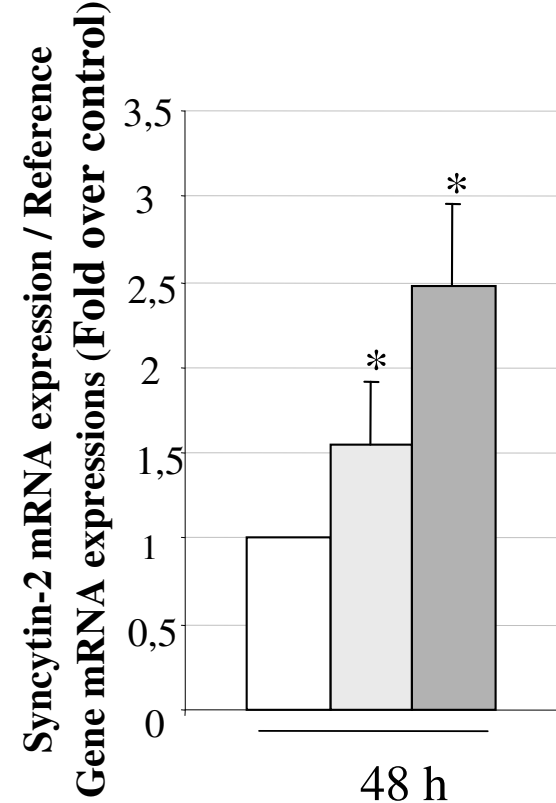

Supplement: MOESM3 [file 9568402]
